# Supplementary material for: Prevalence, knowledge, attitudes and practices regarding rabies among bite victims: a cross-sectional study at a national hospital, Sri Lanka
Source: Research Square preprint supplement (doi:10.21203/rs.3.rs-8401902/v1), 2026-01-29
Supplement: Supplementary file 1 [file 85583953d883d30ebe1fa385.docx]

**Questionnaire on knowledge attitudes and practices towards Rabies**

**Direction: Please circle your answers and/ or specify by writing down**

**Part1: Socio-demographic information of responders**

1. Sex: Male Female
2. Date of birth
3. Ethnicity:

Please specify

1. Profession:

Please specify

**Part 2: Knowledge, attitudes and practices towards Rabies**

1. Have you ever heard of Rabies?

Yes No

1. What is your source of Rabies information?
2. Neighbors/friends
3. Media
4. Veterinary surgeon/ regional veterinary office
5. School
6. Physician/ hospital
7. Experience

1. Is Rabies an infectious disease?

Yes No Do not know

1. Is Rabies preventable?

Yes No Do not know

1. Is Rabies curable?

Yes No Do not know

1. Which animal/s transmit Rabies?

Dog Cat Cow Bat Rat

1. Which of the following are routes of transmission?

Animal bites Animal scratches Inhalation of infected aerosols

Others (Specify)

1. Do you know dogs should be vaccinated against Rabies?

Yes No Do not know

1. Do you know cats should be vaccinated against Rabies?

Yes No Do not know

1. How often animals should be vaccinated against with Rabies?

Six monthly Annually Once in five years Other (Specify)

1. Please tick the relevant response

|  | Agree | Neutral | Disagree |
| --- | --- | --- | --- |
| I should seek for medical advice following exposure to a rabies suspected animal. |  |  |  |
| I should take first-aid before meeting the doctor. |  |  |  |
| The vaccination history of the animal should be checked. |  |  |  |
| The behavior of the animal should be observed for a period of at least one month. |  |  |  |
| I am aware about the post exposure vaccination. |  |  |  |
| I have no issue/ phobia in getting vaccinated. |  |  |  |

1. Have you ever bitten by a rabies suspected animal?

Yes No

1. If yes, indicate (Yes/ No) for the measures you undergo after the exposure?

| Measure | Yes | No |
| --- | --- | --- |
| Went to the hospital immediately |  |  |
| Washed wound with running tap water and soap |  |  |
| Used traditional medicine only |  |  |
| Went to the hospital after traditional medicine |  |  |
| Did nothing |  |  |
| Went to the hospital after first aid |  |  |

1. If yes, indicate (Yes/ No) for the measure you do with animal?

| Measure | Yes | No |
| --- | --- | --- |
| Observed its behavior |  |  |
| Brought its head to Rabies diagnosis |  |  |
| Checked its records of vaccination |  |  |
| Did not care |  |  |
